# Supplementary material for: Understanding activity diversity among Ni-based chalcogenide pre-catalysts under oxygen evolution conditions: the role of oxyanions
Source: Royal Society of Chemistry journal article supplement (doi:10.1039/d3cy00789h), 2023-01-01
Supplement: d3cy00789h1.pdf [file d3cy00789h1.pdf]

## Supporting Information

### Supplemental Methods

#### S1. Thermodynamic modeling of electrochemical stability

The process of gradual replacement of the sulfur atoms by hydroxyl molecules on NiS<sub>2</sub>(100) under an applied voltage was simulated. The reaction equation for the process is shown as

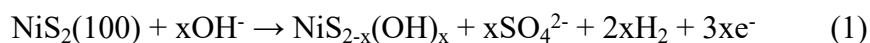

where  $x$  represents the number of anions substituted by OH<sup>-</sup> in the reconstitution process, and the relationship between the reaction free energy  $\Delta G$  and the applied voltage  $U$  can be written as

$$\Delta G = G_{\text{NiS}_{2-x}(\text{OH})_x} + xG_{\text{SO}_4^{2-}} + 2xG_{\text{H}_2} + 3xeU - G_{\text{NiS}_2(100)} - 5xG_{\text{OH}^-} \quad (2)$$

$G_{\text{SO}_4^{2-}}$  is calculated from the following equation:

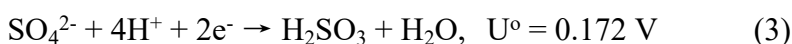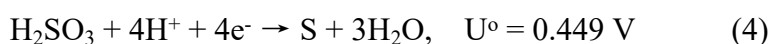

Adding the above equations gives:

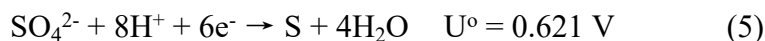

When at the standard electrode potential,  $G_{\text{SO}_4^{2-}}$  can be calculated from the following equation:

$$G_{\text{SO}_4^{2-}} = G_{\text{S}} + 4G_{\text{H}_2\text{O}} - 8G_{\text{H}^+} - 6eU + \Delta G_{\text{pH}}$$

$\Delta G_{\text{pH}}$  is the pH correction term ( $\Delta G_{\text{pH}} = \text{pH} \times k_{\text{B}}T \ln 10$ ).

The reaction equations for the adsorption of soluble SO<sub>4</sub><sup>2-</sup> on Ni(OH)<sub>2</sub> are shown below,

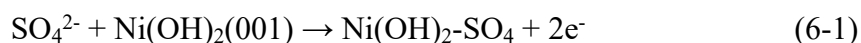

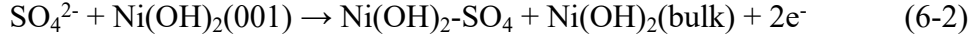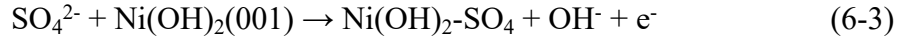

where equation (6-1) represents surface physisorption and interlayer adsorption, equation (6-2) represents defect, and equation (6-3) represents surface chemisorption.

Similarly, the reaction equations for the in-situ construction of  $\text{SO}_4$  from  $\text{NiS}_2$  and combination with  $\text{Ni}(\text{OH})_2$  are shown below:

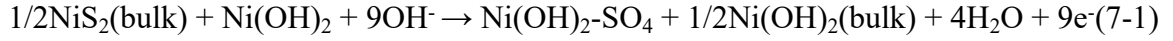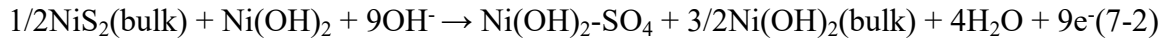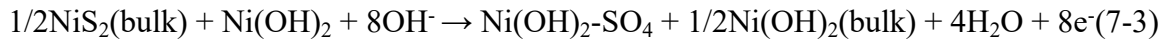

where equation (4-1) represents surface physisorption and interlayer adsorption, equation (4-2) represents defect, and equation (4-3) represents surface chemisorption.

## S2. Gibbs free energy profile of OER

Since the OER reaction explored in this paper was carried out in an alkaline solution (pH=14), the overall reaction equation for the  $4\text{e}^-$  reaction is:

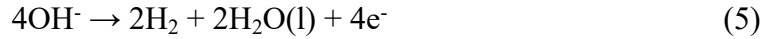

The reaction equation for each elementary step via AEM is,

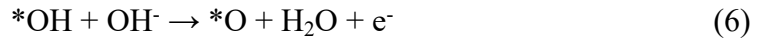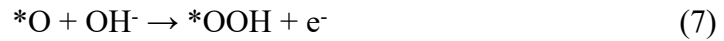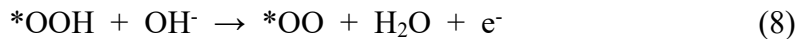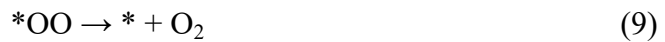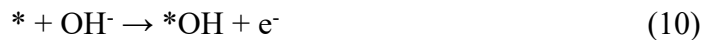

In addition to this, OER may occur via LOM, with the following reaction equation,

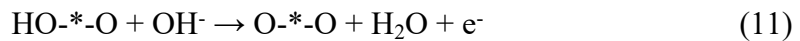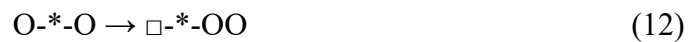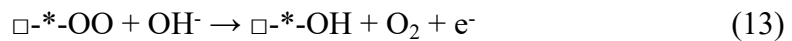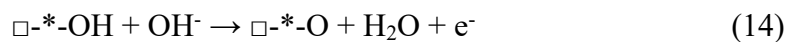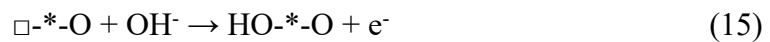

The change in Gibbs free energy ( $\Delta\text{G}$ ) for each step of the primitive reaction can be

---

calculated by the following equation:

$$\Delta G = \Delta E - T\Delta S + \Delta ZPE + \Delta G_U + \Delta G_{pH} \quad (16)$$

where  $\Delta E$  is the difference of the total energy obtained from the DFT calculation.  $\Delta S$  and  $\Delta ZPE$  represent the entropy and zero-point energy, respectively, both obtained from the VASPKIT correction.  $T$  represents the temperature and takes the value of 298.15 K (room temperature).  $\Delta G_U = -eU$ ,  $e$  is the number of charge transfers per electron transfer step and  $U$  is the applied voltage.  $\Delta G_{pH}$  represents the value of Gibbs free energy change caused by pH change and can be calculated by  $\Delta G_{pH} = k_B T \times \ln 10 \times \text{pH}$ ,  $k_B$  is Boltzmann constant,  $\text{pH} = 14$  in alkaline environment. The Gibbs free energy of intermediates, reaction free energy of elementary step and overpotential of OER were listed in Table S1-S4.

## Supplemental Figures

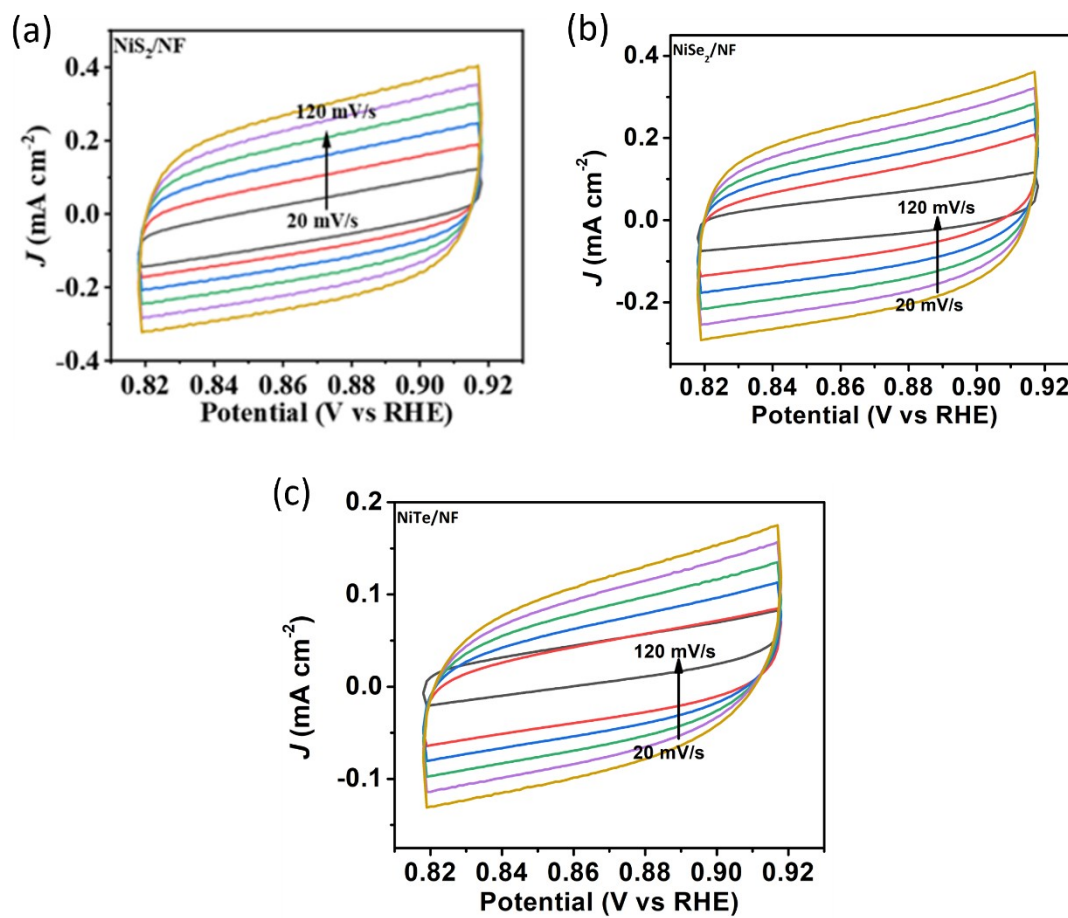

**Fig.S1** Cyclic voltammograms of (a)  $\text{NiS}_2/\text{NF}$ , (b)  $\text{NiSe}_2/\text{NF}$  and (c)  $\text{NiTe}/\text{NF}$  from 0.82 to 0.92 V vs RHE at different scan rates in 1 M KOH.

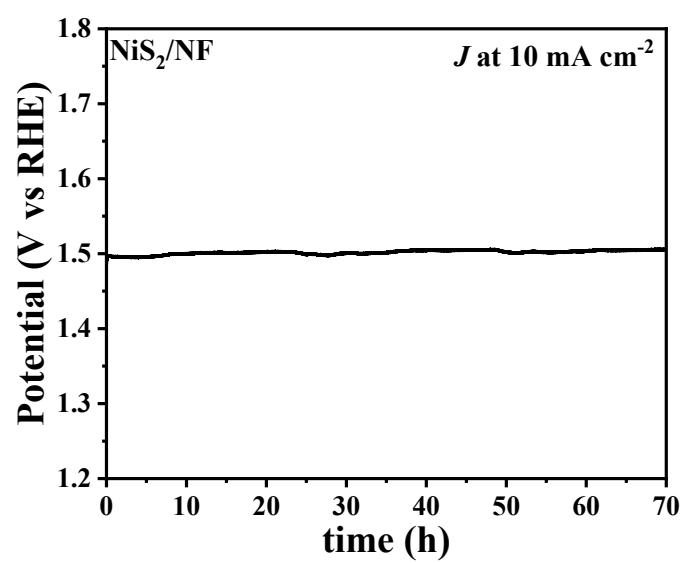

**Fig.S2** Long durability of NiS<sub>2</sub>/NF at 10 mA cm<sup>-2</sup> in 1 M KOH.

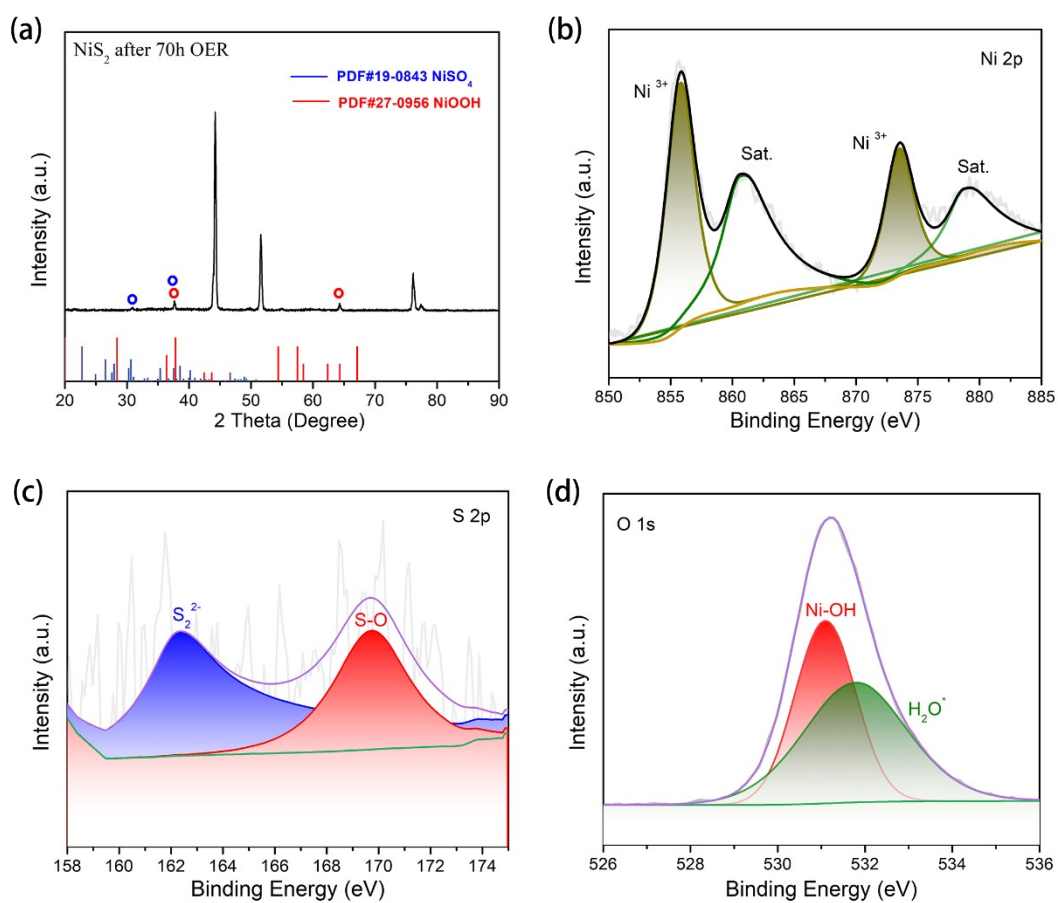

**Fig S3.** (a) XRD patterns, (b) Ni 2p spectrum, (c) S 2p spectrum and (d) O 1s spectrum of NiS<sub>2</sub>/NF after 70h of OER at 10 mA cm<sup>-2</sup> in 1 M KOH.

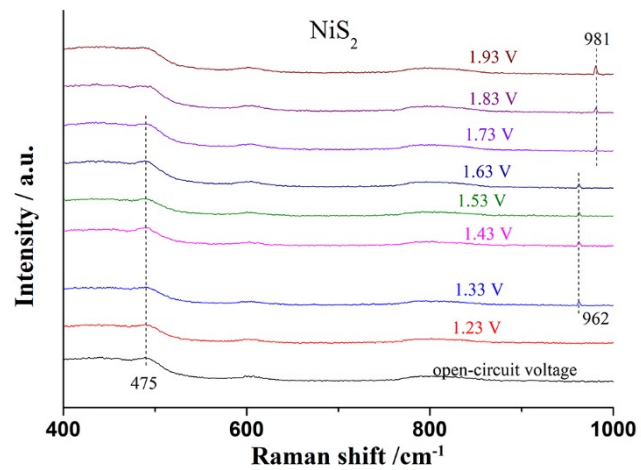

**Fig S4.** Potential-dependent (vs RHE) in-situ Raman spectra of NiS<sub>2</sub> under OER conditions in 1 M KOH.

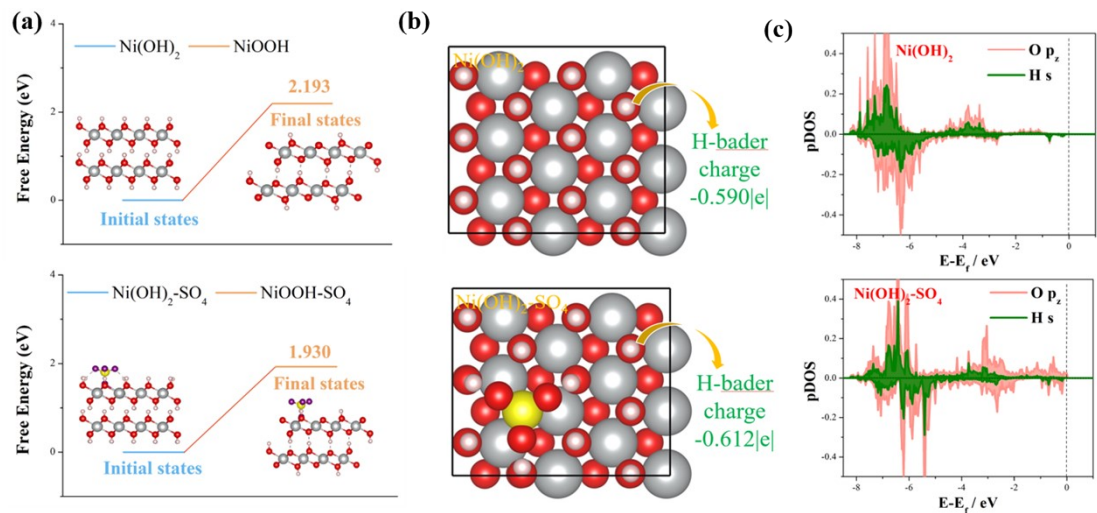

**Fig. S5** (a) Profiles of the free energy for dehydrogenation of  $\text{Ni(OH)}_2$  with and without sulfate chemisorption, (b) Comparison of Bader charge of H atoms in  $\text{Ni(OH)}_2$  with and without sulfate chemisorption, (c) PDOS of  $p_z$  orbital of O atom and s orbital of H atom in  $\text{Ni(OH)}_2$  with and without sulfate chemisorption.

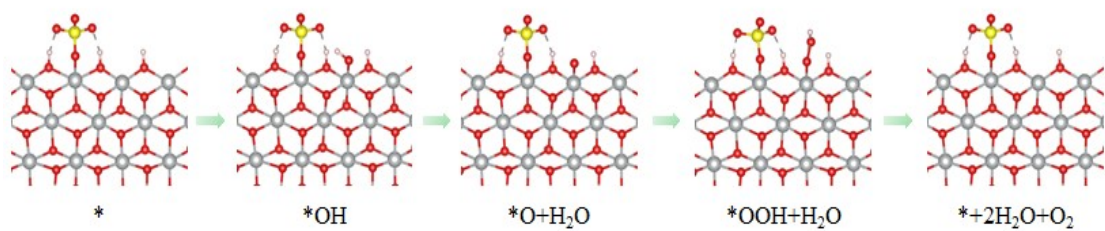

**Fig.S6** Schematic diagram of intermediates of OER on  $\text{NiOOH-SO}_4$  (100) via adsorbate evolution mechanisms (AEM)



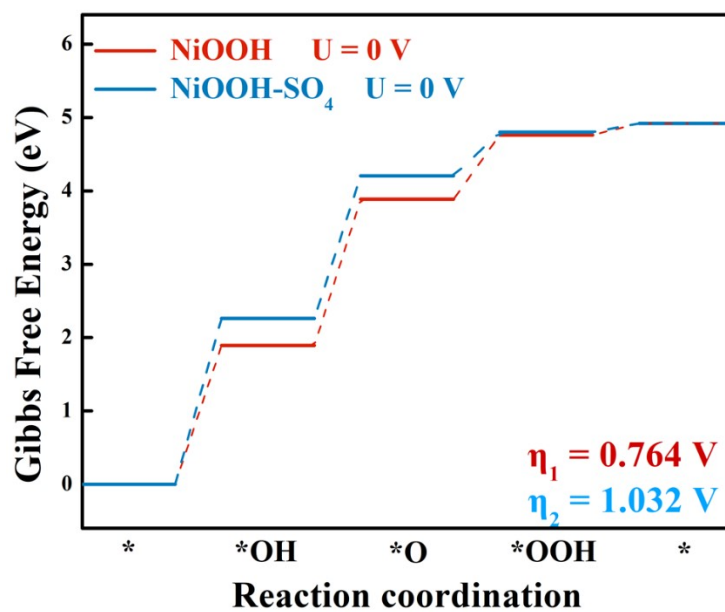

**Fig.S7** Reaction free energy step diagram of NiOOH(1 0 0) and NiOOH-SO<sub>4</sub>(1 0 0) via AEM

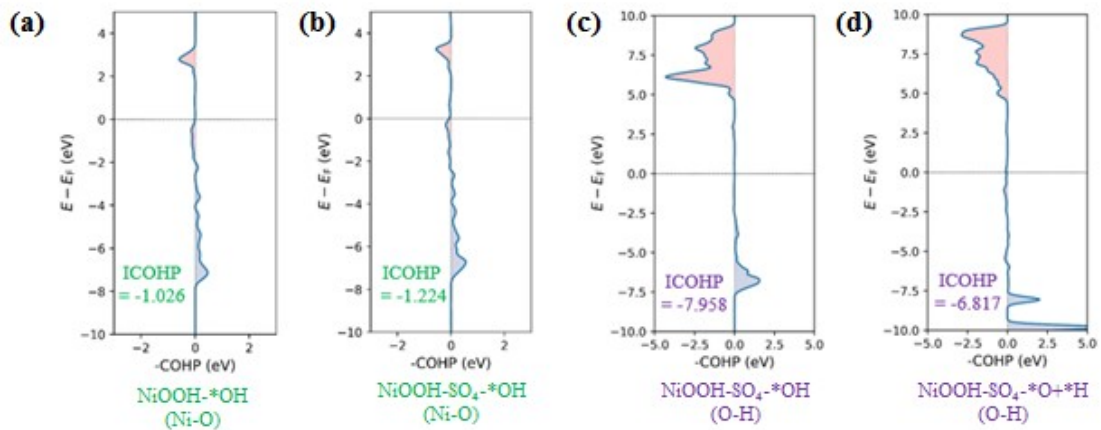

**Fig.S8** Ni-O COHP diagram of the <sup>\*</sup>OH intermediate of (a)NiOOH and (b)NiOOH-SO<sub>4</sub>, and O-H COHP diagram of the <sup>\*</sup>OH intermediate of (c)NiOOH and (d)NiOOH-SO<sub>4</sub>-H.

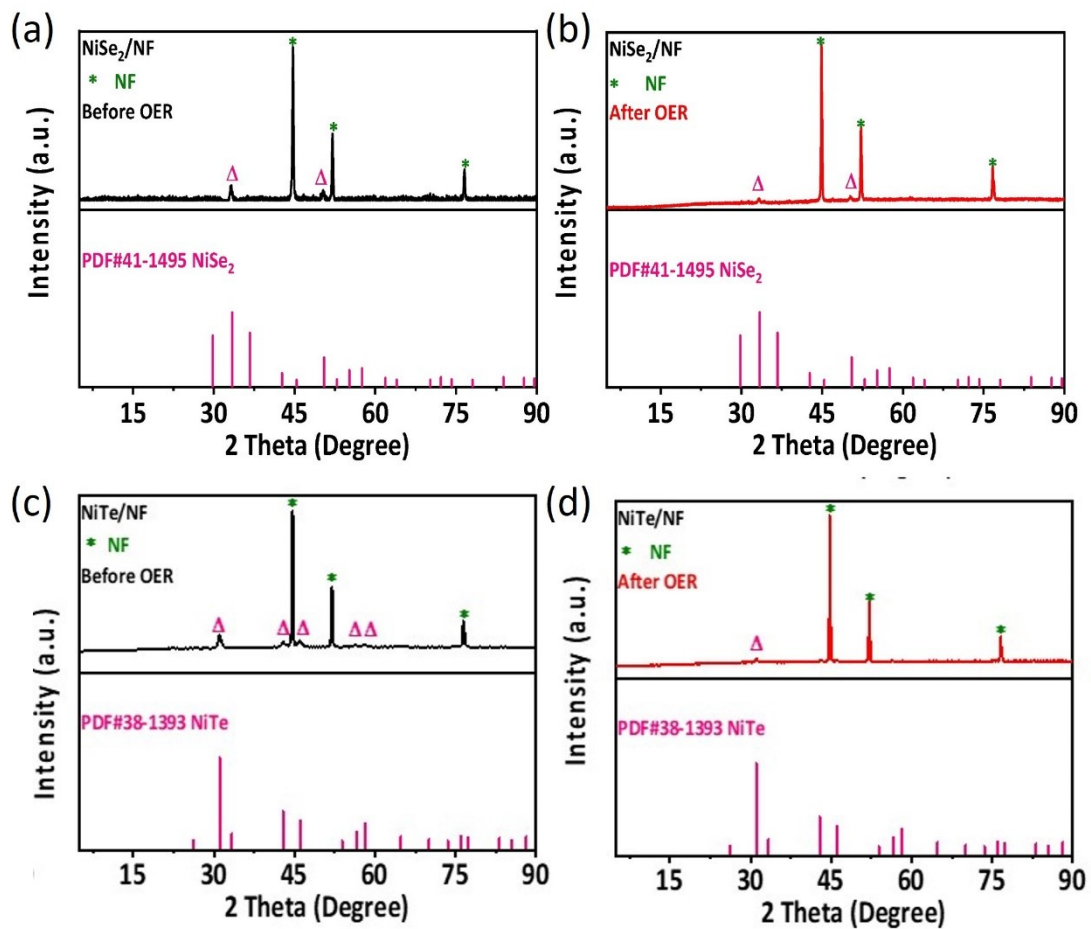

**Fig.S9** (a)(c) XRD patterns of NiSe<sub>2</sub>/NF and NiTe/NF before OER. (b)(d) XRD patterns of NiSe<sub>2</sub>/NF and NiTe/NF after OER

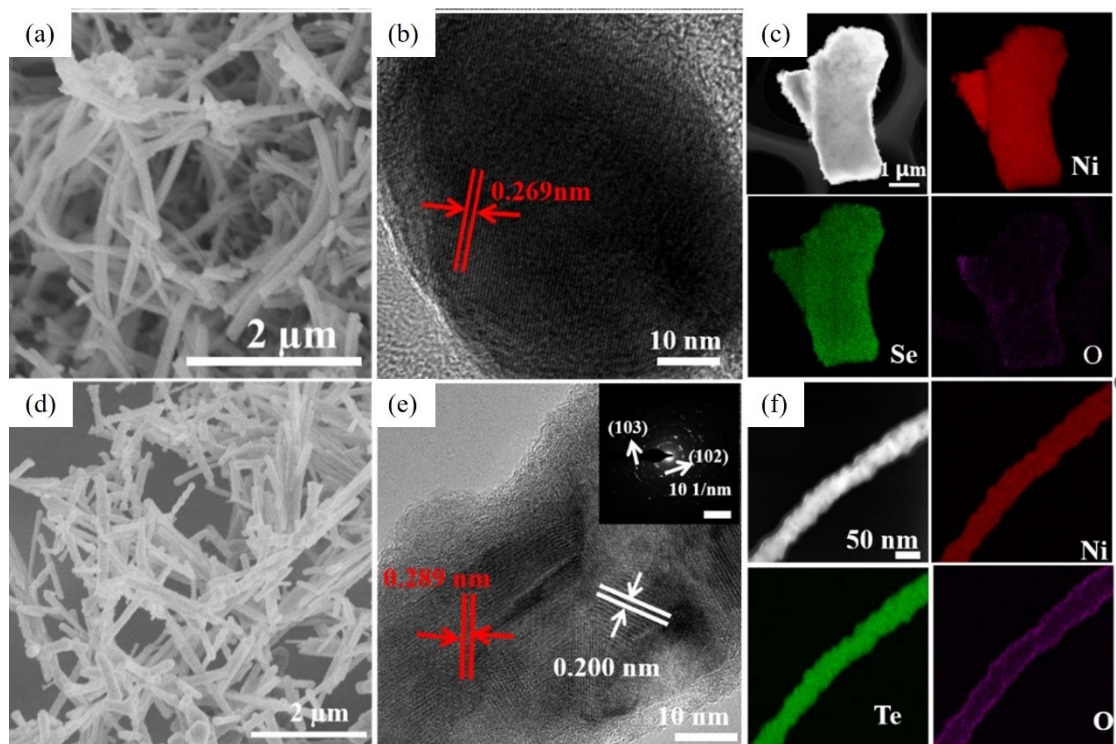

**Fig.S10** (a) SEM, (b) HRTEM, (c) STEM and corresponding EDS mapping images of NiSe<sub>2</sub>/NF. (d) SEM, (e) HRTEM, (f) corresponding EDS mapping images of NiTe/NF

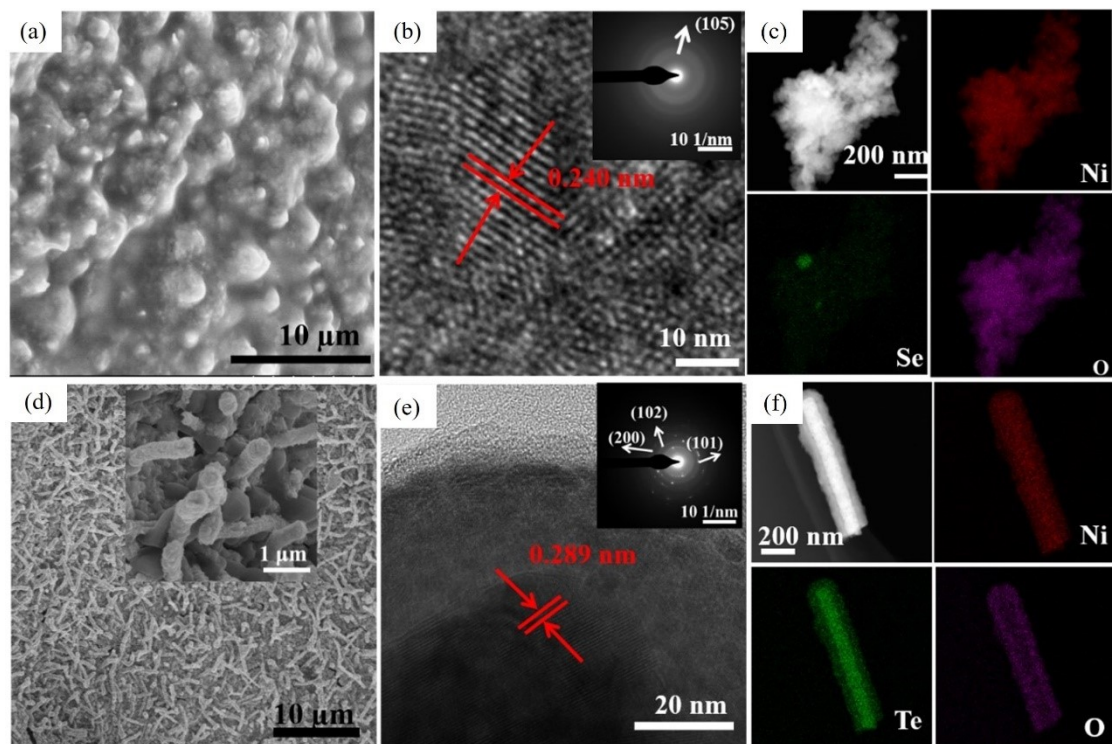

**Fig.S11** (a) SEM, (b) HRTEM, (c) STEM and corresponding EDS mapping images of NiSe<sub>2</sub>/NF after OER. (d) SEM, (e) HRTEM, (f) corresponding EDS mapping images of NiTe/NF after OER.

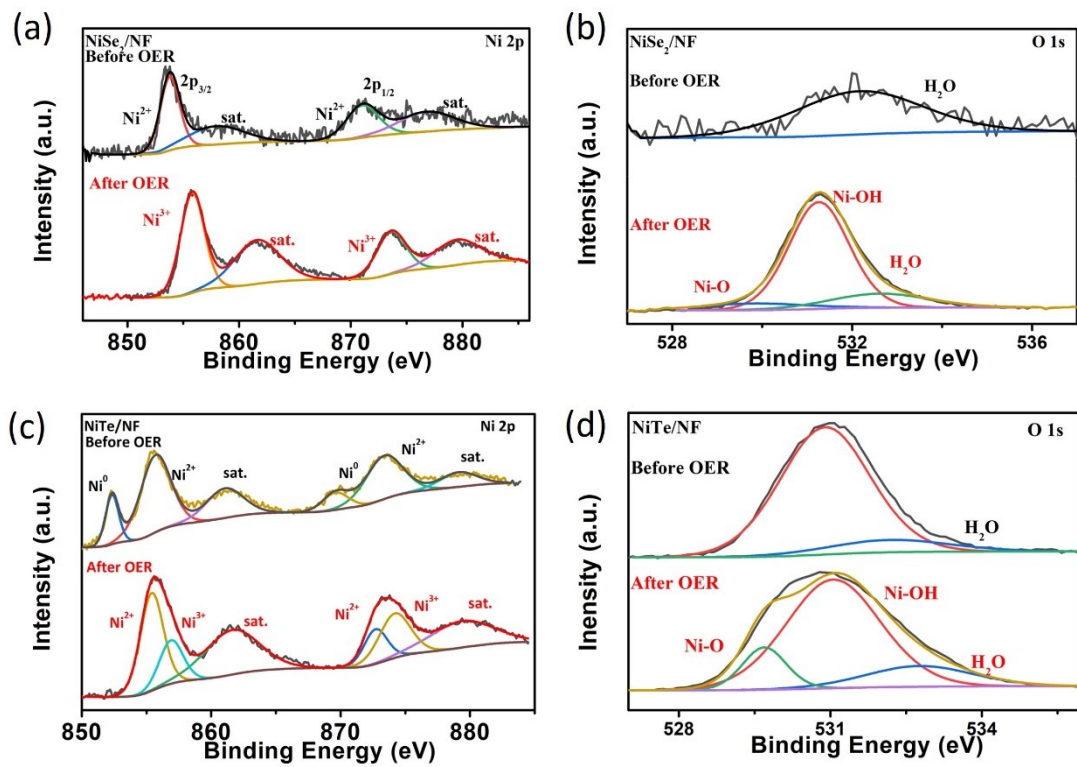

**Fig.S12** (a) Ni 2p spectrum of NiSe<sub>2</sub>/NF before and after OER. (b) O 1s spectrum of NiSe<sub>2</sub>/NF before and after OER. (c) Ni 2p spectrum of NiTe/NF before and after OER. (d) O 1s spectrum of NiTe/NF before and after OER.

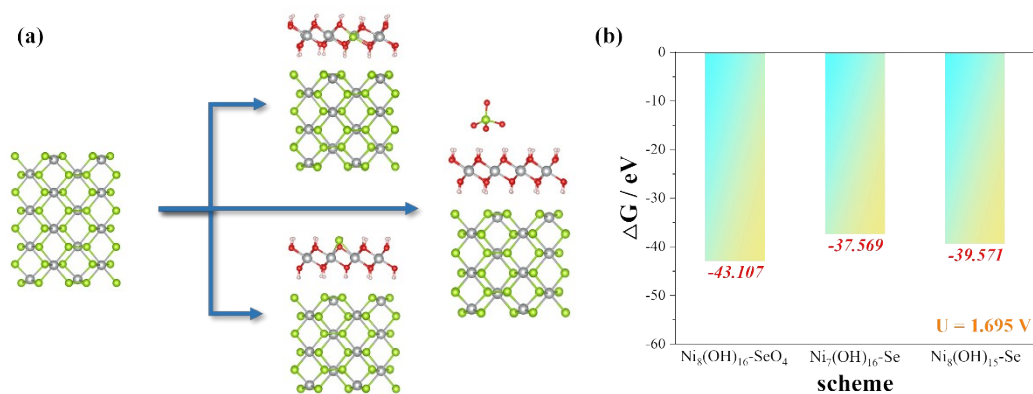

**Fig. S13** (a) Different existence forms of Se anions after electrochemical oxidation and (b) the corresponding formation energy under OER working potential ( $U=1.695 \text{ V}$  vs RHE) of NiSe<sub>2</sub>.

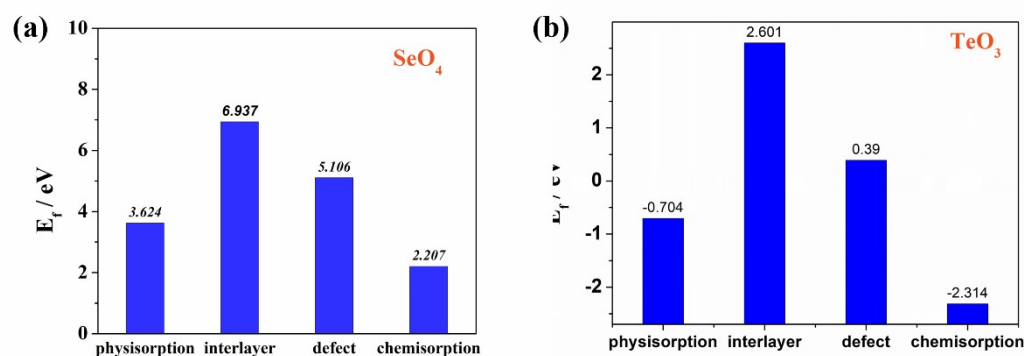

**Fig. S14** (a) Selenates and (b) tellurite formation energy from Se and Te anion of NiSe<sub>2</sub> and NiTe, respectively, for diverse interaction with the layered Ni(OH)<sub>2</sub>.

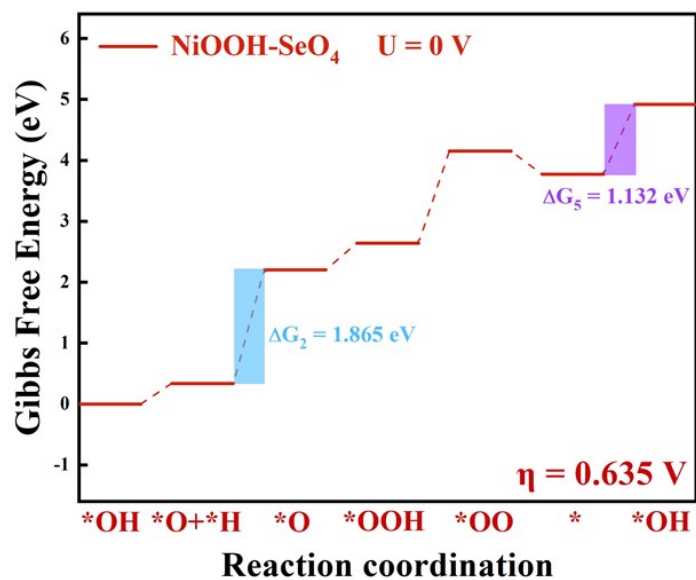

Fig. S15 Reaction path diagram and reaction free energy step diagram of NiOOH-SeO<sub>4</sub>(SeO<sub>4</sub> involved in the reaction) via AEM

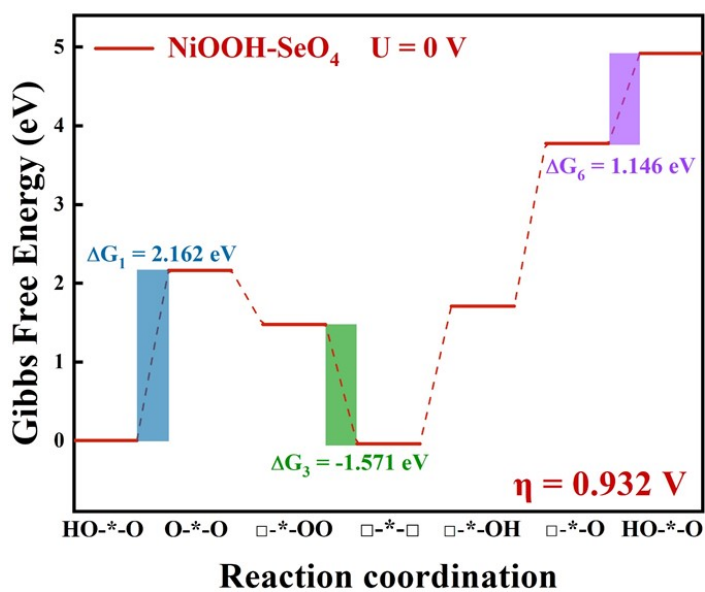

Fig.S16 Reaction free energy step diagram of NiOOH-SeO<sub>4</sub> via LOM



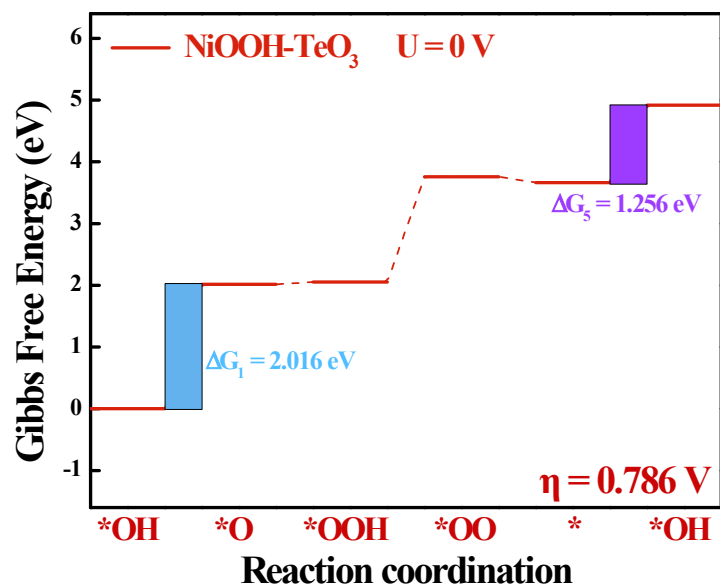

**Fig. S17** Reaction path diagram and reaction free energy step diagram of NiOOH-TeO<sub>3</sub> (TeO<sub>3</sub> can't be involved in the reaction) via AEM

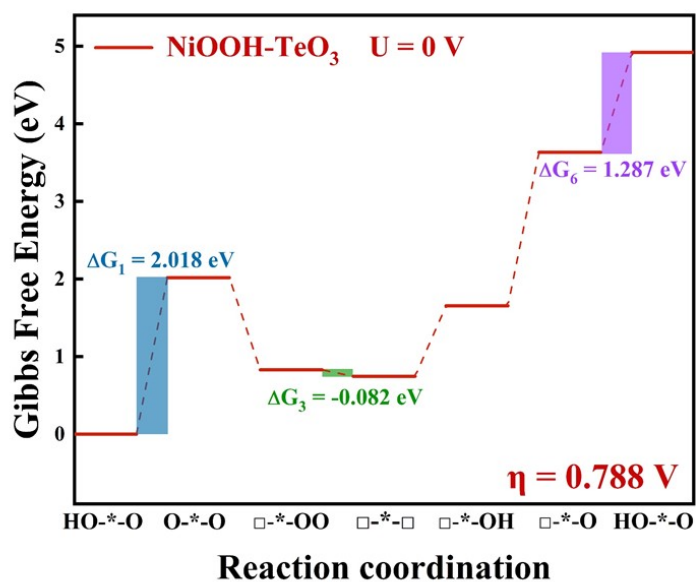

**Fig.S18** Reaction free energy step diagram of NiOOH-TeO<sub>4</sub> via LOM

---

## Supplemental Tables

Table S1 DFT energy, thermodynamic correction energy and Gibbs free energy of each intermediate via AEM

| Sample                           | E / eV   | G <sub>T</sub> / eV | G / eV   |          |
|----------------------------------|----------|---------------------|----------|----------|
| NiOOH (001)                      | *OH      | -467.512            | 0.359    | -467.153 |
|                                  | *O       | -461.741            | 0.046    | -461.695 |
|                                  | *OOH     | -471.752            | 0.417    | -471.334 |
|                                  | *OO      | -467.039            | 0.100    | -466.939 |
|                                  | *        | -459.055            | -        | -459.055 |
| NiOOH (001)-<br>SO <sub>4</sub>  | *OH      | -493.957            | 0.358    | -493.599 |
|                                  | *O+*H    | -493.553            | 0.316    | -493.237 |
|                                  | *O       | -488.175            | 0.057    | -488.118 |
|                                  | *OOH     | -498.450            | 0.390    | -498.060 |
|                                  | *OO      | -493.067            | 0.068    | -492.999 |
| *                                | -483.872 | -                   | -483.872 |          |
| NiOOH (001)-<br>SeO <sub>4</sub> | *OH      | -484.333            | 0.348    | -483.985 |
|                                  | *O+*H    | -483.960            | 0.313    | -483.647 |
|                                  | *O       | -478.369            | 0.040    | -478.329 |
|                                  | *OOH     | -489.115            | 0.347    | -488.768 |
|                                  | *OO      | -483.861            | 0.051    | -483.810 |
| *                                | -474.254 | -                   | -474.254 |          |
| NiOOH (001)-<br>TeO <sub>3</sub> | *OH      | -479.098            | 0.349    | -478.749 |
|                                  | *O       | -473.322            | 0.040    | -473.282 |
|                                  | *OOH     | -484.454            | 0.332    | -484.122 |
|                                  | *OO      |                     |          |          |
|                                  | *        | -469.128            | -        | -469.128 |

---

Table S2 Gibbs reaction energy change each step of and OER overpotential via AEM

| Sample                       |        | $\Delta G / \text{eV}$ | $\eta / \text{V}$ |
|------------------------------|--------|------------------------|-------------------|
| NiOOH (001)                  | step 1 | 1.972                  | 0.739             |
|                              | step 2 | 1.889                  |                   |
|                              | step 3 | 1.184                  |                   |
|                              | step 4 | -1.896                 |                   |
|                              | step 5 | 1.781                  |                   |
| NiOOH (001)-SO <sub>4</sub>  | step 1 | 0.363                  | 0.436             |
|                              | step 2 | 1.666                  |                   |
|                              | step 3 | 0.935                  |                   |
|                              | step 4 | 1.609                  |                   |
|                              | step 5 | -0.803                 |                   |
|                              | step 6 | 1.150                  |                   |
| NiOOH (001)-SeO <sub>4</sub> | step 1 | 0.338                  | 0.635             |
|                              | step 2 | 1.865                  |                   |
|                              | step 3 | 0.438                  |                   |
|                              | step 4 | 1.506                  |                   |
|                              | step 5 | -0.374                 |                   |
|                              | step 6 | 1.147                  |                   |
| NiOOH (001)-TeO <sub>3</sub> | step 1 | 2.016                  | 0.786             |
|                              | step 2 | 0.037                  |                   |
|                              | step 3 |                        |                   |
|                              | step 4 |                        |                   |
|                              | step 5 | 1.256                  |                   |

Table S3 DFT energy, thermodynamic correction energy and Gibbs free energy of each intermediate via LOM

| Sample                           | E / eV | G <sub>T</sub> / eV | G / eV |          |
|----------------------------------|--------|---------------------|--------|----------|
| NiOOH (001)                      | HO-*-O | -467.510            | 0.418  | -467.092 |
|                                  | O-*-O  | -461.421            | 0.112  | -461.309 |
|                                  | □-*-OO | -463.644            | 0.081  | -463.563 |
|                                  | □-*-□  | -454.198            | -      | -454.198 |
|                                  | □-*-OH | -462.641            | 0.349  | -462.292 |
|                                  | □-*-O  | -459.035            | 0.053  | -458.982 |
| NiOOH (001)-<br>SO <sub>4</sub>  | HO-*-O | -488.179            | 0.704  | -487.475 |
|                                  | O-*-O  | -482.228            | 0.090  | -482.138 |
|                                  | □-*-OO | -482.922            | 0.077  | -482.845 |
|                                  | □-*-□  | -474.156            | -      | -474.156 |
|                                  | □-*-OH | -483.804            | 0.343  | -483.461 |
|                                  | □-*-O  | -478.233            | 0.058  | -478.175 |
| NiOOH (001)-<br>SeO <sub>4</sub> | HO-*-O | -484.333            | 0.411  | -483.922 |
|                                  | O-*-O  | -478.421            | 0.112  | -478.309 |
|                                  | □-*-OO | -479.075            | 0.080  | -478.995 |
|                                  | □-*-□  | -470.582            | -      | -470.582 |
|                                  | □-*-OH | -480.061            | 0.350  | -479.711 |
|                                  | □-*-O  | -474.257            | 0.065  | -474.192 |
| NiOOH (001)-<br>TeO <sub>3</sub> | HO-*-O | -479.100            | 0.404  | -478.696 |
|                                  | O-*-O  | -473.322            | 0.096  | -473.226 |
|                                  | □-*-OO | -474.526            | 0.111  | -474.415 |
|                                  | □-*-□  | -464.567            | -      | -464.567 |
|                                  | □-*-OH | -474.870            | 0.335  | -474.535 |
|                                  | □-*-O  | -469.173            | 0.068  | -469.105 |

Table S4 Gibbs reaction energy change each step and OER overpotential via LOM

| Sample                       |        | $\Delta G / \text{eV}$ | $\eta / \text{V}$ |
|------------------------------|--------|------------------------|-------------------|
| NiOOH (001)                  | step 1 | 2.330                  | 1.538             |
|                              | step 2 | -2.254                 |                   |
|                              | step 3 | -0.565                 |                   |
|                              | step 4 | 2.783                  |                   |
|                              | step 5 | -0.142                 |                   |
|                              | step 6 | 2.768                  |                   |
| NiOOH (001)-SO <sub>4</sub>  | step 1 | 1.885                  | 0.655             |
|                              | step 2 | -0.707                 |                   |
|                              | step 3 | -1.241                 |                   |
|                              | step 4 | 1.572                  |                   |
|                              | step 5 | 1.834                  |                   |
|                              | step 6 | 1.577                  |                   |
| NiOOH (001)-SeO <sub>4</sub> | step 1 | 2.162                  | 0.932             |
|                              | step 2 | -0.686                 |                   |
|                              | step 3 | -1.517                 |                   |
|                              | step 4 | 1.748                  |                   |
|                              | step 5 | 2.067                  |                   |
|                              | step 6 | 1.146                  |                   |
| NiOOH (001)-TeO <sub>3</sub> | step 1 | 2.018                  | 0.788             |
|                              | step 2 | -1.189                 |                   |
|                              | step 3 | -0.082                 |                   |
|                              | step 4 | 0.908                  |                   |
|                              | step 5 | 1.978                  |                   |
|                              | step 6 | 1.287                  |                   |
